1

2 **A geography aware reconciliation method to investigate host/parasite cospeciation**

3

4 **V. Berry<sup>1</sup>, F. Chevenet<sup>1&2</sup>, J-P. Doyon<sup>1</sup>, E. Jousset<sup>3</sup>**

5 <sup>1</sup> Institut de Biologie Computationnelle, LIRMM, UMR 5506 CNRS, Université de Montpellier,  
6 France

7

8 <sup>2</sup> MIVEGEC, CNRS 5290, IRD 224, Université de Montpellier, France

9

10 <sup>3</sup> **CBGP, INRA, CIRAD, IRD, Montpellier SupAgro, Univ. Montpellier**, Centre de Biologie pour  
11 la Gestion des Populations, 755 avenue du campus Agropolis CS 30016 34988 Montferrier-sur-Lez,  
12 **France**

13

14 **Corresponding authors:** V. Berry [yberry@lirmm.fr](mailto:yberry@lirmm.fr) and E. Jousset  
15 [emmanuelle.jousset@inra.fr](mailto:emmanuelle.jousset@inra.fr)

16

17 **Running title (45 characters): Geography aware reconciliation**

18

18 **ABSTRACT (250 WORDS)**

19

19 Cospeciation studies aim at investigating whether hosts and symbionts speciate simultaneously or  
20 whether the associations diversify through host shifts. This problem is often tackled through  
21 reconciliation analyses that map the symbiont phylogeny onto the host phylogeny by mixing different  
22 types of diversification events. These reconciliations generate numerous scenarios that are difficult to  
23 interpret and not always biologically realistic. Researchers have underlined that the biogeographic  
24 histories of both hosts and symbionts influence the probability of cospeciation and host switches, but  
25 up to now no reconciliation software integrate geographic data. We present a new functionality in the  
26 *Mowgli* software that bridges this gap. The user can provide geographic information on both the host  
27 and symbiont extant and ancestral taxa. Constraints in the reconciliation algorithm have been  
28 implemented to generate biologically realistic codiversification scenarios. In addition, we updated the  
29 reconciliation viewer *SylvX* in order to visualize ancestral characters states on the phylogenetic trees.  
30 We apply our method to the fig/fig wasp association, a textbook example of cospeciation, and  
31 demonstrate that it generates cospeciation scenarios that are geographically consistent. In addition, we  
32 show that the comparison of reconciliations obtained with and without geographic constraints can help  
33 solving ambiguities in the biogeographic histories of the partners. With the development of robust  
34 methods in historical biogeography and the advent of next generation sequencing that leads to better-  
35 resolved trees, a geography aware reconciliation method represents a substantial advance that is likely  
36 to be useful to researchers studying the evolution of biotic interactions and biogeography.

37

38 **Keywords: Ancestral trait, biogeography, cophylogeny, host/parasite interactions, software, ,**  
39 **tree visualization.**

40

## 41 1) INTRODUCTION

42 Biotic interactions play a prominent role in species diversification. Interactions that result into long-  
43 term associations persisting over evolutionary time scales can sometimes lead to cospeciation, i.e. the  
44 concomitant occurrence of speciation in lineages that are ecologically associated (Brooks 1981; Page  
45 1990, 1991). The idea that such a pattern can occur first stemmed from parasitological studies  
46 suggesting that parasite classifications reflect the phylogenetic relationships of their hosts (Fahrenholz  
47 1913). Hafner & Nadler (1988; 1994) were the first authors to thoroughly test this assertion. They used  
48 the association between some small mammals (pocket gophers) and their lice as a model system and  
49 provided a clear demonstration that the phylogenies of the two interacting lineages were parallel. This  
50 study, spurred further research on coevolutionary diversification. The developments of specific  
51 methods that aimed at testing the congruence of the phylogenetic histories of interacting organisms  
52 have since played an important role in the study of cospeciation. It is indeed these methods that moved  
53 cospeciation studies beyond visual comparisons of phylogenetic trees and ad-hoc narratives for these  
54 visualizations. It soon became apparent that the study of the concordance between phylogenetic trees  
55 could be applied to reconciling gene trees and species trees (Page & Charleston 1997; Page &  
56 Charleston 1998) which further enhanced the interest of evolutionary biologists for methodological  
57 developments in this field.

58 Reviews on cospeciation methods (Brooks *et al.* 2004, Doyon, 2011, de Vienne *et al.* 2013;  
59 Johnson & Clayton 2004; Martínez-Aquino 2016; Paterson & Banks 2001; Stevens 2004) all  
60 emphasize the diversity and the complexity of the scenarios that must be explored when testing for the  
61 congruence of speciation events in two interacting lineages. To compare host and parasite phylogenies,  
62 Brooks & McLennan (Brooks 1981; Brooks & McLennan 1991) first developed a parsimony method  
63 (the Brooks Parsimony Analysis, BPA). In this method the associations between hosts and their  
64 parasites are transformed into a matrix of host characters and the parsimony tree reconstructed from  
65 such a matrix is then compared to the host phylogeny. A decade later, Page and collaborators  
66 developed a fundamentally different method, called “tree reconciliation”, a term first coined in the  
67 work of Goodman *et al.* (1979) that compared gene and species trees. This method attempts to  
68 reconcile the phylogenetic history of the parasite with that of their hosts: the parasite phylogeny is  
69 “mapped” onto the host phylogeny (i.e. each node in the parasite tree is assigned to a node in the host  
70 phylogeny). In such a map, the diversification events of the parasites are linked to their host  
71 phylogenetic history, so that four types of events are considered: cospeciation events, host switches,  
72 sorting events and duplication events (Page 1994a; Page 1994b) (see material and method for a  
73 description of each event). When graphically displayed, reconciliation maps greatly ease our  
74 understanding of the evolution of biotic interactions.

75 Algorithms to optimize reconciliations are numerous. One of the first reconciliation software,  
76 *TreeMap 2*, uses an algorithm called “Jungles” (Charleston 1998) where each event is assigned a cost:  
77 the chosen reconciliations are the ones that have minimum costs. However it generates an exponential  
78 number of scenarios. Recent methods have proposed more efficient algorithms that moreover can just  
79 search for an optimal reconciliation: e.g. *Tarzan*, (Merkle & Middendorf, 2005); *Jane*, (Conow *et al.*  
80 2010); *Core-PA* (Merkle *et al.*, 2010), *Mowgli*, (Doyon *et al.* 2010), *COALA* (Baudet *et al.* 2015),  
81 *ecceTERA* (Jacox *et al.* 2016), *Notung* (Stolzer *et al.* 2012). Recently, the *RASCAL* software proposed  
82 to infer suboptimal scenarios to achieve lower computing times (Drinkwater & Charleston 2016).  
83 Cospeciation is witnessed on a reconciliation map whenever a speciation node in the parasite  
84 phylogeny is mapped onto a speciation on the host phylogeny. Another requirement for demonstrating  
85 that two interacting lineages have cospeciated is to provide evidence of the temporal congruence of the  
86 cospeciation events in the host and parasite phylogenies (Page 1991). Though reconciliation  
87 algorithms do not strictly enforce the simultaneity of cospeciation events, they can enforce time

88 consistency in the sequence of evolutionary events meaning that the parasite cannot switch back in  
89 time onto a host that no longer exists (*i.e.* transfers cannot occur towards a node in the host phylogeny  
90 that has already split into child species at the time of the transfer event) (Merkle *et al.* 2005; Nojgaard  
91 *et al.* 2017). This constraint is explicit in *Mowgli* (Doyon *et al.* 2011; Doyon *et al.* 2010), *ecceTera*  
92 (Jacox *et al.* 2016) and *RASCAL* (Drinkwater & Charleston 2016). Hence, reconciliation methods have  
93 greatly improved in the last decade; algorithms are now efficient and some algorithms have solved the  
94 time consistency issue that affected some of the first methodological developments in the field.  
95 However, the multiplicity of optimal evolutionary scenarios can still be daunting. It is generally  
96 difficult to sort these scenarios out a posteriori and identify the most realistic ones. Much remains to  
97 be done to improve these inferences and translate them into evolutionary scenarios that give insights  
98 into the biological factors that govern the evolution of interspecific associations.

99         Some key information that could significantly improve our inferences but are overlooked in  
100 codiversification methods are the geographic locations of extant and ancestral nodes. Indeed, the  
101 biogeographic histories of interacting lineages necessarily constrain their common part of evolutionary  
102 history (Alcala *et al. in press*, Martinez-Aquino *et al.* 2014; Nieberding *et al.* 2010). Obviously,  
103 cospeciation can only happen between taxa that co-occur in the same area. Host switches can also be  
104 influenced by the geographic proximity of the “sending” and the “receiving” hosts. In their seminal  
105 paper, Hafner & Adler (1988) highlight that “no case of suspected host-switching involves hosts that  
106 are geographically distinct” implying that this was evidence that their codiversification scenario was  
107 plausible. Indeed, in parasites that live their entire life cycle onto their hosts and have little or no  
108 dispersal forms (e.g. Clayton *et al.* 2004), transfers can only happen between hosts that coexist in the  
109 same locality. On the other hand, in biotic interactions where the symbionts can experience long  
110 dispersal events, transfers do not need to happen between sympatric hosts. However, they are only  
111 possible if the “source” and “destination” host geographic locations coincide with the geography of the  
112 dispersal events along the corresponding branches in the parasite phylogeny. Therefore, a more  
113 accurate mapping of cospeciation and host switch events can be obtained if the geographic locations of  
114 both hosts and parasites are known prior to conducting the reconciliation. Methods for inferring  
115 historical biogeography from phylogenetic reconstructions have improved in the last decades and  
116 generate robust scenarios (Beeravolu Reddy & Condamine 2016; Meseguer *et al.* 2015; Ree &  
117 Sanmartin 2009; Ronquist *et al.* 2011). These can serve as inputs for reconciliation analyses. In this  
118 paper we build on these advances to provide a geography-aware reconciliation method, pushing  
119 further the realism of scenarios proposed by such methods.

120         We first describe constraints that need to be enforced to ensure geographic consistencies in  
121 reconciliations and implement them in the *Mowgli* software that already generates time-consistent  
122 reconciliations (Doyon *et al.* 2010). We also update the reconciliation viewer, *SylvX* (Chevenet *et al.*  
123 2016), in order to integrate and visualize annotations (e.g. geographic areas) at ancestral nodes for the  
124 host and parasite phylogenies. We then test these new developments on a mock dataset and on a  
125 ‘textbook’ example of cospeciation, the interaction between figs (*Ficus*) and their pollinating fig  
126 wasps (Cruaud *et al.* 2012). We show on this example that our approach can filter out scenarios that are  
127 geographically implausible and point out inconsistencies in the historical biogeography of the lineages  
128 involved in the interactions.

## 129                 2) METHODS

### 130                 **Extending *Mowgli* to account for geographic information**

131 In this section we first recall the reconciliation model followed by *Mowgli* (Doyon *et al.*  
132 2010), in particular the precise set of evolutionary events it considers.

133 Only rooted trees are considered, whose leaf nodes (tips) are each labelled by a taxon. Internal nodes  
134 usually have two descendants, but the case where an internal node has a single child also occurs when  
135 the evolution of an ancestral lineage living a relatively long period of time is decomposed into a set of  
136 consecutive time periods called *slices* (see Fig. 3 of Supplementary Material 1). This slicing of  
137 branches is a transparent artefact that allows reconciliation methods to achieve fast computing times  
138 while still ensuring time consistency of host switches (see Doyon *et al.* 2010; Jacox *et al.* 2016;  
139 Libeskind-Hadas & Charleston 2009).

140 Let  $P$  and  $H$  denote respectively a parasite and a host tree. Reconciliation algorithms usually  
141 consider each current and ancestral host to be associated with one or several specific parasites at any  
142 time (e.g. in *Mowgli*, *TreeMap*, *Jane*). However, the identity of the host can vary over time, e.g. after a  
143 *host switch*. This evolutionary event is one of the four types of *events* considered in cospeciation  
144 studies:

145 - a host switch, also known as a host transfer (T event), happens when a parasite lineage from  
146 a source host is transferred to a destination host. The transfer of the parasite has to be time consistent,  
147 that is the two branches  $(x_p, x)$  and  $(x'_p, x')$  have to belong to the same time slice;

148 - a cospeciation (S event) happens when the speciation of a parasite shortly follows or  
149 coincides with the speciation of its host. This is considered by *Mowgli* as a joint speciation of both  
150 parasite and its host;

151 - a *within host speciation* also known as duplication (D event), models a speciation of a  
152 parasite  $u$  of  $P$ , where both descendant species continue to live on the host that  $u$  lived on. This is  
153 represented by  $u$  evolving along a  $(x_p, x)$  branch of  $H$  and then dividing into two new lineages in  $(x_p, x)$ ;

154 - a parasite loss (L event) occurs when a parasite lineage goes extinct while its host persists.

155 An illustration of these events can be found in Fig.1 of Supplementary Material 1.

156 *Mowgli* also sometimes considers combinations of events in order to speed up computations. A SL  
157 event occurs shortly after a cospeciation (S): one of the parasite child lineages is quickly lost on a  
158 child lineage of the host. A TL event occurs when a parasite  $u$  evolving on a branch  $(x_p, x)$  is lost (L) on  
159 this branch shortly after having switched (T) to another host  $(x'_p, x')$ .

160 As explained above, accounting for geographic information can lead to more realistic codiversification  
161 scenarios. We integrate such information first by assigning a set of *areas* to each node of  $P$  and  $H$ . For  
162 an extant taxon this means that a population of the corresponding species is reported to live in each of  
163 the assigned area. Similarly, when an internal taxon is assigned to one or several areas, this means that  
164 populations of this now extinct taxon are inferred to have lived at the time in these geographical zones.  
165 The inference of ancestral areas can be conducted with different approaches and tools, e.g. ancestral  
166 character state reconstruction using Maximum Likelihood optimization as implemented in *R* (Revell,  
167 2012) or the dispersal-extinction-cladogenesis (DEC) model implemented in *Lagrange* (Ree & Smith  
168 2008).

169 In order to avoid biogeographic inconsistencies and propose meaningful reconciliations between the  $P$   
170 and  $H$  trees, specific constraints have to be implemented in reconciliation algorithms. We detail below  
171 how we model these constraints in the context of the four D/T/L/S events or combinations thereof.

172 First, note that areas of a node and its parent in the host or parasite tree can be different, due to  
173 dispersal and vicariance events. During the reconciliation process, the time period represented by a  
174 branch between nodes  $x_p$  and  $x$  of the host tree is considered to be assigned the union of the areas of  $x_p$   
175 and  $x$ : if a species changes area along the way from one area assigned to  $x_p$  to a different one assigned  
176 to  $x$ , we do not know exactly when this happens, so we consider that at any time between  $x_p$  and  $x$ , part  
177 of the population of the evolving species can live in any area proposed for  $x_p$  or  $x$ .

178 First considering nodes of the trees, we denote by  $area(x)$  the set of geographic areas where a species  $x$   
179 is observed (tip) or inferred (internal node). If  $x$  is a fictive node, in the middle of branch  $(y_p, y)$   
180 resulting from the slicing of the initial tree  $H$ , then  $area(x)$  is defined as the union of  $area(y)$  and  
181  $area(y_p)$ .

182 Now considering branches  $(x_p, x)$  of the  $P$  and  $H$  trees, let  $area(x_p, x)$  be the set of areas where the  
183 species might have lived during this period of its evolution: this is the union of  $area(x_p)$  and  $area(x)$ .  
184 Note that each area for which exactly one of the two species  $x$  and  $x_p$  is present represents species  
185 migration or extinction events that have occurred along this branch. Note that only  $(x_p, x)$  branches  
186 being one slice high are considered for  $H$ , as *Mowgli* operates on this level of detail.

187 We now detail which geographic constraints apply so that the reconciliation between a parasite tree  $P$   
188 and a host tree  $T$  is geographically consistent.

189 - An extant parasite  $u$  can be mapped onto a current host  $x$ , only if  $area(u) \subseteq area(x)$  (Figure 1A). The  
190 reconciliation mapping cannot be computed by *Mowgli*, if this constraint is not respected.

191 - We allow the mapping of an ancestral parasite  $u$  at a speciation node  $x$  in the host tree, only if  
192  $area(u) \subseteq area(x)$  (Figure 1B). Each area where  $x$  is present and  $u$  is not (i.e.,  $area(x) \setminus area(u)$ )  
193 represents a population of host  $x$  that does not have  $u$  as a parasite.

194 - If a branch  $(u_p, u)$  of the parasite is going through a node  $x$  of the host tree (which happens when the  
195 host speciates into two descendant hosts but the parasite sticks to only one of them), then the sets of  
196  $area(x)$  and  $area(u_p, u)$  must have common elements (Figure 1C).

197 - If a branch  $(u_p, u)$  of the parasite tree is mapped for all or part of it in a host branch  $(x_p, x)$  (Figure 1D),  
198 then we require that  $area(u_p, u)$  and  $area(x_p, x)$  have a non-empty intersection, i.e. that there is at least  
199 one area where the parasite and the host were able to meet.

200 - If an internal node  $u$  of  $P$  is mapped in a branch  $(x_p, x)$  of the host tree (Figure 1E) then we require  
201 that  $area(u) \subseteq area(x_p, x)$ .

202 When respecting the above constraints, *Mowgli* will propose a scenario that is geographically  
203 consistent. However, this scenario can have a higher cost than those obtained when not accounting for  
204 geographic information. This simply results from the fact that the search space contains geographically  
205 inconsistent scenarios that are possibly less costly. *Mowgli's* extension described above, allows  
206 choosing the less costly scenario among those that are geographically consistent.

## 207 **SylvX new functionalities**

208 We extended the *SylvX* editor in order to visualize current and ancestral geographic areas of hosts and  
209 symbionts. Pie charts can be used to display alternative areas for each node of the tree and/or the  
210 reconciliation. Area colour sets can be dynamically updated and tuned using the Hue, Saturation and  
211 Value scales. Thresholds are available to simplify views.

## 212 **Implementation**

213 *Mowgli* takes a “host tree” and a “parasite tree” in Newick format. A list of nodes with their  
214 geographic annotations can be given in the same file. Biogeographic inferences typically generate  
215 probability or likelihood values for each character state (area) at each node. *Mowgli* can take a single  
216 area at each node: the most likely area for instance. Alternatively, when several areas are specified in  
217 *Mowgli*, they are interpreted as a multi-state character. In this case, the geographic area of a node is  
218 considered as the combination of all listed areas and therefore any parasite living in at least one of  
219 these areas can be mapped on this node (see Supplementary Material 1).

220 *SylvX* takes a host tree in a Newick format with node id numbers together with a reconciliation (with  
221 symbiont tree node *id.*). The host tree (*outputspeciesspecies*) and reconciliations obtained with *Mowgli*  
222 can be directly imported into *SylvX*. Annotation files for the host and parasite phylogenies giving node  
223 information can be imported in a CSV format. As many annotations as needed can be added in the  
224 annotation files and it is up to the user to choose which ones to plot onto the species tree and the  
225 reconciliation map through *SylvX* interface.

226 In order to obtain files that are compatible between both software, we provide a *Perl* script that can be  
227 run through single command lines in order to: 1) obtain tree node identifiers that will be used by both  
228 programs and 2) transform these trees and corresponding annotations file into *Mowgli* format (see  
229 Supplementary Material 2 for a description of the full procedure to generate files and perform a  
230 complete analysis).

## 231 3) WORKED EXAMPLES

### 232 **Datasets**

233 To demonstrate the method and its utility, we tested it on two datasets. We first created a mock  
234 dataset: two phylogenetic trees for a hypothetical host/parasite interaction in which extant and ancient  
235 geographic areas for each lineage are informed. The dataset was generated so that: 1) present-day  
236 geographic areas of associated taxa are consistent (i.e. hosts and associated parasites live in the same  
237 area); 2) the two phylogenies are not perfectly parallel but show some cospeciation events; 3) some  
238 geographic locations at nodes that we would like to cospeciate do not coincide in the parasite and host  
239 phylogenies. We ran *Mowgli* on this dataset successively with and without enforcing geographic  
240 constraints using in both cases the default parameters (cost 0 for a cospeciation, 1 for a loss and 1 for a  
241 transfer, 1 for duplication, not enforcing the root of the parasite tree to be mapped on the root of the  
242 species tree).

243 As a second dataset, we used a subset of the data from the latest phylogenetic investigation of  
244 figs (*Ficus*) and their pollinating figs wasps (Cruaud *et al.* 2012). For both partners of the association,  
245 biogeographic scenarios were available for 200 taxa. From the complete phylogenetic trees (available  
246 in <http://datadryad.org>, doi: 10.5061/dryad.hr620), we derived two trees of 23 taxa each, that included  
247 a couple of representative species for each *Ficus* main taxonomic subdivision. We excluded one of the  
248 fig subgenera (*Pharmacosycea*) and its associated pollinators (*Tetrapus* spp.) whose phylogenetic  
249 position is still debated. We have not tested our method on the total dataset presented in Cruaud *et al.*  
250 (2012) as some uncertainties remain concerning the root of the phylogenetic trees, which could lead to  
251 spurious interpretations. The most likely ancestral geographic areas of each node were directly derived  
252 from the biogeographic reconstructions of Cruaud *et al.* 2012 (obtained with Maximum Likelihood  
253 Optimization). We ran *Mowgli* on this dataset with and without enforcing geographic constraints  
254 (using default event costs and not enforcing the root of the parasite tree to be mapped on the root of

255 the species tree), and explored how these reconstructions shed light on the biogeographic history of the  
256 association.

## 257 **Results**

258 Figure 2 represents the reconstruction obtained on the mock dataset. Taking geographic  
259 constraints into account (Figure 2B) precludes obtaining a cospeciation event at a node where the two  
260 associates do not live in the same area (node S1 of the host tree in Figure 2A and 2B). The transfer T1  
261 preceding this cospeciation event in Figure 2A is also geographically inconsistent as it suggests a  
262 dispersal (the donor host lives in Asia or Africa, and the receiving host lives in America) while the  
263 parasite actually stays in Africa. The scenario obtained when enforcing geographic constraints is more  
264 costly but consistent (Figure 2B): it entails one more transfer and also one less cospeciation event but  
265 is biologically more realistic.

266 On the fig/fig wasp dataset (Figure 3), not accounting for geographical constraints leads to  
267 geographic inconsistency in one node (S1 in the host tree of Figure 3A) and the transfer that follows  
268 (event T7 on Figure 3A). Enforcing geographic constraints generates a reconciliation scenario that is  
269 more costly (Figure 3B, one more transfer is necessary to reconcile the two phylogenies) but coherent  
270 with the figs and the fig wasps biogeographic histories. This scenario suggests that the fig wasps  
271 independently colonized figs in the Neotropics and in the Afrotropics through two distinct host  
272 switches from Asia rather than accompanied the speciation of their hosts, as was suggested by Figure  
273 3A (and node 29 of Figure S12 in Cruaud *et al.* 2012). The annotation of ancestral geographic areas on  
274 the reconciliation map also shows that host switches occurred both in “sympatric” settings (within the  
275 same geographic areas as broadly defined in our dataset) and allopatric settings (i.e. host switches  
276 occur between two geographically distant hosts). Overall, four switches out of seven occurred in  
277 sympatry (T1, 2, 4, 5) while the remaining three switches (T3, 6, 7) correspond to long distance  
278 dispersal events.

## 279 **4 DISCUSSION**

280 We provide here significant extensions for two reconciliation tools to infer co-diversification  
281 scenarios that, for the first time, can take the historical biogeographies of the associated lineages into  
282 account. The extension of the *Mowgli* software precludes geographic inconsistency during the  
283 reconciliation process. The resulting reconciliations can then be visualized and edited in the *SylvX*  
284 updated graphical interface that now integrates annotations of ancestral nodes. *Mowgli* is already one  
285 of the few time-consistent efficient methods that build optimal reconciliations. With the integration of  
286 geographic constraints in its algorithm, this tool now provides more realistic codiversification  
287 scenarios than other reconciliation methods. In some cospeciation studies, a large number of optimal  
288 reconciliations can be proposed for a combination of compared trees (Nguyen *et al.* 2013) and their  
289 interpretation can be daunting. Producing biologically realistic scenarios can diminish the complexity  
290 of these coevolutionary analyses by reducing the optimal set of scenarios to a handful of possibilities  
291 that can be further scrutinized for biological interpretation. In addition, geography-aware  
292 reconciliations can reveal whether host switches generally occur in sympatry or whether they are  
293 associated with dispersal events of the symbionts. Alternatively, comparing reconciliations can point  
294 out discrepancies in the biogeographic reconstructions of the host and symbiont lineages under  
295 investigation.

296 In the particular example of the fig/fig wasp interaction presented here, the geographic  
297 inconsistency revealed at one of the cospeciating nodes in the analysis ran without constraints might  
298 actually point out some ambiguity in the biogeographic history of the *Ficus* hosts. According to the

299 inference conducted in Cruaud *et al.* (2012) the most likely area for the common ancestor of  
300 Neotropical figs (belonging to the *Americana* section) and Afrotropical figs (belonging to the  
301 *Galoglychia* section) is Africa while the proposed cospeciating pollinators lived in Asia (S1 Figure  
302 3A). In order to respect geographic consistency, our geography-aware reconciliation suggests that the  
303 current association of figs wasps with *Galoglychia* in Africa and *Americana* in the Neotropics is the  
304 result of two independent switches (Figure 3B, events T6 and T7) of the pollinators from an Asian fig  
305 ancestor (the ancestor of the *Conosycea* figs). However, the biogeographic analysis of Cruaud *et al.*  
306 (2012) also suggested that the node S1 of *Ficus* could be situated in Asia (though with a smaller  
307 likelihood than the Afrotropics). “Correcting” the biogeographic inference of *Ficus* and locating node  
308 S1 in Asia would actually reconcile the host/fig and fig wasp trees as in Figure 3a without violating  
309 any geographic constraints. It would diminish the cost of the reconciliation by inducing one less  
310 transfer and entail one more cospeciation event. We will not conclude on the biogeographic history of  
311 the fig/fig wasp association as the purpose of our study is not to explore alternative scenarios for this  
312 association. It is merely to demonstrate the utility of our method in revealing inconsistency between  
313 biogeographic scenarios and a cospeciation hypothesis and therefore improve codiversification  
314 scenarios and/or biogeographic inferences

### 315 **Perspectives**

316 The cospeciation tools developed in this study could be applied to all interspecific interactions  
317 for which biogeographic scenarios are available for both partners. For now those are few, but fast  
318 developments in new sequencing technologies generate more accurate and more exhaustive  
319 phylogenies. Methods in historical biogeography have also improved. So we can hope that more  
320 datasets will be available in the near future and that cospeciation could be tested on more systems  
321 (Cruaud & Rasplus 2016). For instance, robust phylogenies and biogeographic scenarios are now  
322 available for groups of lice that have been model systems in coevolutionary studies (Boyd *et al.*  
323 2017a). Once comprehensive phylogenies of the hosts are available, our method could be used to  
324 better understand the geography of host switches in this system. Geography-aware reconciliation could  
325 also be applied to explore the diversification history of the numerous parasitic wasps that are part of  
326 the microfauna exploiting figs: several lineages of parasitic wasps have been shown to partly  
327 cospeciate with their host figs (Jousselin *et al.* 2008) and biogeographic scenarios for some lineages  
328 are available (Cruaud *et al.* 2011). Other nursery pollination/mutualisms such as the interaction  
329 between *Yucca* and their pollinating moths are also good candidates for including geographic  
330 constraints into coevolutionary scenarios as some studies have questioned the respective role of  
331 geography and host-plant association in driving the diversification of *Yucca* moths (Althoff *et al.*  
332 2012). Parasitoid/host insect associations (e.g. Deng *et al.* 2013; Hamerlinck *et al.* 2016; Wilson *et al.*  
333 2012) and herbivorous insect/plant interactions (e.g. McLeish *et al.* 2007; Percy *et al.* 2004) showing  
334 significant cospeciation could also be studied.

335 Furthermore, the approach presented in this paper does not only apply to geographic  
336 information and could be extended to other biological traits. For instance in systems where the species  
337 are partitioned into different habitats (e.g. forest canopy species vs savannah species), geographic  
338 areas could be replaced by traits related to the ecological niches; constraints that are similar to the ones  
339 applied for geography could then be easily transferrable. Informing ancestral characters for habitats on  
340 the host and the symbiont phylogenetic trees and using “*Mowgli* with constraints” would result in  
341 constraining cospeciation and host switches to associates sharing the same ecological habitats. In a  
342 similar way, the respective climatic niches of associated organisms could also be used when parasite  
343 (or symbiont) distributions are known to be strongly constrained by thermal tolerance (see Singh *et al.*  
344 2017 for a recent study showing that climatic conditions influences the patterns of association between



345 fungi and their algal partners). In many specialized interactions that show significant cospeciation,  
346 such as host/obligate bacterial endosymbionts (e.g. Jousselin *et al.* 2009, Rosenblueth *et al.* 2012,  
347 Boyd *et al.* 2017b) or host/viruses associations (e.g. Ramsden *et al.* 2009; Garamszegi 2009), inferring  
348 ancestral character states for some ecological traits for the “symbiotic” lineages (the parasite) is not  
349 always straightforward. However, the evolution of these obligate associations and their maintenance  
350 are still governed by some phenotype matching between the partners. For instance in host/bacterial  
351 symbiont associations, the metabolic complementarity of the host and the symbiont (Zientz *et al.*  
352 2004) could be reconstructed and used to constrain the reconciliations. In host/virus associations,  
353 information about the host immune system and viruses adaptations could be used (Longdon *et al.*  
354 2014). The extension of *Mowgli* proposed here could probably be adapted to fit the biological  
355 properties of these associations

356         Independently of the new functionalities implemented in *Mowgli*, the concomitant update of  
357 *SylvX* allows the comparison of ancestral states for any character of the hosts and/or the symbionts.  
358 This can help interpreting reconciliations by replacing them in their biological context. One of the  
359 most useful functionalities of *SylvX* is now to be able to visualize whether host switches are associated  
360 with evolutionary transitions in character states in both the parasite and/or the host. It can therefore  
361 help understanding the biological processes that are associated with these transfers. Mapping  
362 characters of the associates throughout the reconciliation can also help investigating whether there is  
363 correlated trait evolution in host and parasites. Until now, such correlations could only be investigated  
364 on one of the associates phylogeny (e.g. Sorci *et al.* 2003, Jousselin *et al.* 2003, Johnson *et al.* 2005).  
365 Looking at simultaneous transitions in character states in both partners throughout a host/parasite  
366 reconciliation might help identifying co-adapted traits that constrain the association.

367         In conclusion, we provide here a framework that can integrate the character histories of the  
368 associates into the reconciliation process. This allows recovering more biologically realistic scenarios.  
369 It can also shed lights on character history inferences by pointing out inconsistencies between the  
370 character states of the two associates on the reconciliation map. The new developments made in *SylvX*  
371 facilitate these interpretations. The use of “constraint-aware” reconciliations is preferable to current  
372 practices that consist in elaborating ad-hoc narratives once the reconciliations are obtained and  
373 compared with the character histories of associates.

#### 374         **ACKNOWLEDGMENTS**

375         We thank A. Cruaud, JY Rasplus & coll. for sharing the fig/fig-wasp dataset. *Funding*: ANR  
376 Phylospace.

#### 377         **AUTHOR CONTRIBUTION**

378         VB, JPD and EJ designed the study. VB and JPD developed *Mowgli*, FC developed *SylvX*. VB and EJ  
379 wrote the manuscript with contributions of FC.

#### 380         **SOFTWARE AVAILABILITY**

381         *SylvX* is available on [www.sylvx.org](http://www.sylvx.org) with manual and example files and can be installed on any  
382 platforms. *Mowgli* is available [Dryad doi:10.5061/dryad.78bd0](https://doi.org/10.5061/dryad.78bd0) (and will be shortly on  
383 <http://www.atgc-montpellier.fr/Mowgli/>) with manual and example files and can be installed on Linux  
384 and OSX (Mac) computers, *GeoRecHelper* and example files are available on [Dryad](https://doi.org/10.5061/dryad.78bd0)  
385 [doi:10.5061/dryad.78bd0](https://doi.org/10.5061/dryad.78bd0).

#### 386         **REFERENCES**

- 387 Alcalá N, Jenkins T, Christe P, Vuilleumier S Host shift and cospeciation rate estimation from co-  
388 phylogenies. *Ecology Letters*, in press.
- 389 Althoff DM, Segraves KA, Smith CI, Leebens-Mack J, Pellmyr O (2012) Geographic isolation trumps  
390 coevolution as a driver of yucca and yucca moth diversification. *Molecular Phylogenetics and*  
391 *Evolution* **62**, 898-906.
- 392 Baudet C, Donati B, Sinimeri B, *et al.* (2015) Cophylogeny Reconstruction via an Approximate  
393 Bayesian Computation. *Systematic Biology* **64**, 416-431.
- 394 Beeravolu Reddy C, Condamine F (2016) An Extended Maximum Likelihood Inference of  
395 Geographic Range Evolution by Dispersal, Local Extinction and Cladogenesis. *BioRxiv*.  
396 <https://doi.org/10.1101/038695>
- 397 Boyd BM, Allen JM, Nguyen N-P, *et al.* (2017a) Phylogenomics using Target-Restricted Assembly  
398 Resolves Intrageneric Relationships of Parasitic Lice (Phthiraptera: Columbicola). *Systematic*  
399 *Biology*, syx027.
- 400 Boyd BM, Allen JM, Nguyen N-P, *et al.* (2017b) Primates, Lice and Bacteria: Speciation and Genome  
401 Evolution in the Symbionts of Hominid Lice. *Molecular Biology and Evolution* **34**, 1743-  
402 1757.
- 403 Brooks D (1981) Hennig's parastological method: a proposed solution *Systematic Zoology* **30**, 229-  
404 249.
- 405 Brooks D, McLennan DE (1991) *Phylogeny, Ecology, and Behavior*, Chicago.
- 406 Brooks DR, Dowling APG, van Veller MGP, Hoberg EP (2004) Ending a decade of deception: a  
407 valiant failure, a not so-valiant failure, and a success story. *Cladistics* **20**, 32-46.
- 408 Charleston MA (1998) Jungles: a new solution to the host/parasite phylogeny reconciliation problem.  
409 *Mathematical Biosciences* **149**, 191-223.
- 410 Chevenet F, Doyon JP, Scornavacca C, *et al.* (2016) *SylvX*: a viewer for phylogenetic tree  
411 reconciliations. *Bioinformatics* **32**, 608-613.
- 412 Clayton DH, Bush SE, Johnson KP (2004) Ecology of congruence: past meets present. *Systematic*  
413 *Biology* **53**, 165-173.
- 414 Conow C, Fielder D, Ovadia Y, Libeskind-Hadas R (2010) *Jane*: a new tool for the cophylogeny  
415 reconstruction problem. *Algorithms for Molecular Biology* **5**.
- 416 Cruaud A, Jabbour-Zahab R, Genson G, *et al.* (2011) Out of Australia and back again: the world-wide  
417 historical biogeography of non-pollinating fig wasps (Hymenoptera: Sycophaginae). *Journal*  
418 *of Biogeography* **38**, 209-225.
- 419 Cruaud A, Rasplus J-Y (2016) Testing cospeciation through large-scale cophylogenetic studies.  
420 *Current Opinion in Insect Science* **18**, 53-59.
- 421 Cruaud A, Ronsted N, Chantarasuwan B, *et al.* (2012) An Extreme Case of Plant-Insect  
422 Codiversification: Figs and Fig-Pollinating Wasps. *Systematic Biology* **61**, 1029-1047.
- 423 de Vienne DM, Refregier G, Lopez-Villavicencio M, *et al.* (2013) Cospeciation vs host-shift  
424 speciation: methods for testing, evidence from natural associations and relation to coevolution.  
425 *New Phytologist* **198**, 347-385.
- 426 Deng J, Yu F, Li H-B, *et al.* (2013) Cophylogenetic relationships between Anicetusparasitoids  
427 (Hymenoptera: Encyrtidae) and their scale insect hosts (Hemiptera: Coccidae). *BMC*  
428 *Evolutionary Biology* **13**, 275.
- 429 Doyon J-P, Ranwez V, Daubin V, Berry V (2011) Models, algorithms and programs for phylogeny  
430 reconciliation. *Briefings in Bioinformatics* **12**, 392-400.
- 431 Doyon JP, Scornavacca C, Gorbunov KY, *et al.* (2010) An Efficient Algorithm for Gene/Species  
432 Trees Parsimonious Reconciliation with Losses, Duplications and Transfers. In: *Comparative*  
433 *Genomics* (ed. Tannier E), pp. 93-108.

- 434 Drinkwater B, Charleston MA (2016) RASCAL: A Randomized Approach for Coevolutionary  
435 Analysis. *Journal of Computational Biology* **23**, 218-227.
- 436 Fahrenholz H (1913) Ectoparasiten und Abstammungslehre. *Zool. Anz.* **41**, 371-374.
- 437 Garamszegi LZ (2009) Patterns of co-speciation and host switching in primate malaria parasites.  
438 *Malaria Journal* **8**.
- 439 Goodman M, Czelusniak J, Moore GW, Romero-Herrera AE, Matsuda G (1979) Fitting the Gene  
440 Lineage into its Species Lineage, a Parsimony Strategy Illustrated by Cladograms Constructed  
441 from Globin Sequences. *Systematic Zoology* **28**, 132-163.
- 442 Hafner MS, Nadler SA (1988) Phylogenetic trees support the coevolution of parasites and their hosts.  
443 *Nature* **332**, 258-259.
- 444 Hafner MS, Sudman PD, Villablanca FX, *et al.* (1994) Disparate rates of molecular evolution in  
445 cospeciating hosts and parasites. *Science* **265**, 1087-1090.
- 446 Hamerlinck G, Hulbert D, Hood GR, Smith JJ, Forbes AA (2016) Histories of host shifts and  
447 cospeciation among free-living parasitoids of Rhagoletis flies. *Journal of Evolutionary*  
448 *Biology* **29**, 1766-1779.
- 449 Jacox E, Chauve C, Szollosi GJ, Ponty Y, Scornavacca C (2016) *ecceTERA*: comprehensive gene tree-  
450 species tree reconciliation using parsimony. *Bioinformatics* **32**, 2056-2058.
- 451 Johnson KP, Bush SE, Clayton DH (2005) Correlated evolution of host and parasite body size: Tests  
452 of Harrison's rule using birds and lice. *Evolution* **59**, 1744-1753.
- 453 Johnson KP, Clayton DH (2004) Untangling coevolutionary history. *Systematic Biology* **53**, 92-94.
- 454 Joussetin E, Desdevises Y, Coeur d'acier A (2009) Fine-scale cospeciation between *Brachycaudus* and  
455 *Buchnera aphidicola*: bacterial genome helps define species and evolutionary relationships in  
456 aphids. *Proceedings of the Royal Society B: Biological Sciences* **276**, 187-196.
- 457 Joussetin E, Rasplus JY, Kjellberg F (2003) Convergence and coevolution in a mutualism: Evidence  
458 from a molecular phylogeny of *Ficus*. *Evolution* **57**, 1255-1269.
- 459 Joussetin E, van Noort S, Berry V, *et al.* (2008) One Fig to Bind Them All: Host Conservatism in a  
460 Fig Wasp Community Unraveled by Cospeciation Analyses among Pollinating and Non-  
461 pollinating Fig Wasps. *Evolution* **62**, 1777-1797.
- 462 Libeskind-Hadas R, Charleston MA (2009) On the Computational Complexity of the Reticulate  
463 Cophylogeny Reconstruction Problem. *Journal of Computational Biology* **16**, 105-117.
- 464 Longdon B, Brockhurst MA, Russell CA, Welch JJ, Jiggins FM (2014) The Evolution and Genetics of  
465 Virus Host Shifts. *Plos Pathogens* **10**, e1004395.
- 466 Martínez-Aquino A (2016) Phylogenetic framework for coevolutionary studies: a compass for  
467 exploring jungles of tangled trees. *Current Zoology*.
- 468 Martinez-Aquino A, Ceccarelli FS, Eguiarte LE, Vazquez-Dominguez E, de Leon GPP (2014) Do the  
469 Historical Biogeography and Evolutionary History of the Digenean *Margotrema* spp. across  
470 Central Mexico Mirror Those of Their Freshwater Fish Hosts (Goodeinae)? *Plos One* **9**.
- 471 McLeish MJ, Crespi BJ, Chapman TW, Schwarz MP (2007) Parallel diversification of Australian gall-  
472 thrips on Acacia. *Molecular Phylogenetics and Evolution* **43**, 714-725.
- 473 Merkle D, Middendorf M (2005) Reconstruction of the cophylogenetic history of related phylogenetic  
474 trees with divergence timing information. *Theory in Biosciences* **123**, 277-299.
- 475 Meseguer AS, Lobo JM, Ree R, Beerling DJ, Sanmartin I (2015) Integrating Fossils, Phylogenies, and  
476 Niche Models into Biogeography to Reveal Ancient Evolutionary History: The Case of  
477 *Hypericum* (Hypericaceae). *Systematic Biology* **64**, 215-232.
- 478 Nguyen T-H, Ranwez V, Berry V, Scornavacca C (2013) Support Measures to Estimate the Reliability  
479 of Evolutionary Events Predicted by Reconciliation Methods. *Plos One* **8**, e73667.

- 480 Nieberding C, Jousset E, Desdevises Y (2010) The use of co-phylogeographic patterns to predict the  
481 nature of host-parasite interactions, and vice versa. In: *The Biogeography of Host-parasite*  
482 *interactions* (eds. Morand S, Krasnov BR), pp. 59-70. Oxford University Press, New York.
- 483 Nøjgaard N, Geiß M, Stadler PF et al. (2017) Forbidden time travel : chracterization of Time-  
484 consistent tree reconciliation map. The LIPIcs Leibniz International Proceedings in  
485 Informatics: "Algorithms in Bioinformatics", 17th International Workshop, WABI  
486 2017, Boston MA, USA.
- 487 Page RD (1994a) Maps between trees and cladistic analysis of historical associations among genes,  
488 organisms, and areas. *Systematic Biology* **43**, 58-77.
- 489 Page RD, Charleston MA (1997) From gene to organismal phylogeny: reconciled trees and the gene  
490 tree/species tree problem. *Molecular Phylogenetics and Evolution* **7**, 231-240.
- 491 Page RD, Charleston MA (1998) Trees within trees: phylogeny and historical associations. *Trends in*  
492 *Ecology and Evolution* **13**, 356-359.
- 493 Page RDM (1990) Temporal congruence and cladistic analysis of biogeography and cospeciation.  
494 *Systematic Zoology* **39**, 205-226.
- 495 Page RDM (1991) Clocks, clades, and cospeciation: comparing rates of evolution and timing of  
496 cospeciation events in host-parasite assemblages. *Systematic Zoology* **40**, 188-198.
- 497 Page RDM (1994b) Parallel phylogenies: reconstructing the history of host-parasite assemblages.  
498 *Cladistics* **10**, 155-173.
- 499 Paterson AM, Banks J (2001) Analytical approaches to measuring cospeciation of host and parasites:  
500 through a glass, darkly. *International Journal for Parasitology* **31**, 1012-1022.
- 501 Percy DM, Page RD, Cronk QCB (2004) Plant-insect interactions: double-dating associated insect and  
502 plant lineages reveals asynchronous radiations. *Systematic Biology* **53**, 120-127.
- 503 Ramsden C, Holmes EC, Charleston MA (2009) Hantavirus Evolution in Relation to Its Rodent and  
504 Insectivore Hosts: No Evidence for Codivergence. *Molecular Biology and Evolution* **26**, 143-  
505 153.
- 506 Ree RH, Sanmartin I (2009) Prospects and challenges for parametric models in historical  
507 biogeographical inference. *Journal of Biogeography* **36**, 1211-1220.
- 508 Ree RH, Smith SA (2008) Maximum likelihood inference of geographic range evolution by dispersal,  
509 local extinction, and cladogenesis. *Systematic Biology* **57**, 4-14.
- 510 Revell LJ (2012) phytools: an R package for phylogenetic comparative biology (and other things).  
511 *Methods in Ecology and Evolution* **3**, 217-223.
- 512 Ronquist F, Sanmartin I, Futuyma DJ, Shaffer HB, Simberloff D (2011) Phylogenetic methods in  
513 biogeography. *Annual Review of Ecology, Evolution, and Systematics* **42**, 441-464.
- 514 Rosenblueth M, Sayavedra L, Samano-Sanchez H, Roth A, Martinez-Romero E (2012) Evolutionary  
515 relationships of flavobacterial and enterobacterial endosymbionts with their scale insect hosts  
516 (Hemiptera: Coccoidea). *Journal of Evolutionary Biology* **25**, 2357-2368.
- 517 Singh G, Dal Grande F, Divakar PK, et al. (2017) Fungal-algal association patterns in lichen  
518 symbiosis linked to macroclimate. *New Phytologist* **214**, 317-329.
- 519 Sorci G, Skarstein F, Morand S, Hugot JP (2003) Correlated evolution between host immunity and  
520 parasite life histories in primates and oxyurid parasites. *Proceedings of the Royal Society B-*  
521 *Biological Sciences* **270**, 2481-2484.
- 522 Stevens J (2004) Computational aspects of host-parasite phylogenies. *Brief Bioinform* **5**, 339-349.
- 523 Stolzer M, Lai H, Xu ML, et al. (2012) Inferring duplications, losses, transfers and incomplete lineage  
524 sorting with nonbinary species trees. *Bioinformatics* **28**, I409-I415.
- 525 Wilson JS, Forister ML, Dyer LA, et al. (2012) Host conservatism, host shifts and diversification  
526 across three trophic levels in two Neotropical forests. *Journal of Evolutionary Biology* **25**,  
527 532-546.

528 Zientz E, Dandekar T, Gross R (2004) Metabolic interdependence of obligate intracellular bacteria and  
529 their insect hosts. *Microbiology and Molecular Biology Reviews* **68**, 745-770.

530

531 Figure 1: Description of how geographical constraints are handled by the *Mowgli* software, black dots  
532 ● represent nodes of the parasite tree, plain and dash black lines represent branches of the parasite tree,  
533 cylinders represent branches of the host tree, ellipses closing the cylinders represent nodes of the host  
534 tree; coloured dots ●, ●, ● represent different geographic areas of the parasite or the host. A) A parasite  
535 leaf  $u$  can be mapped to a leaf  $x$  of the host tree if the areas of the host contains all areas of the  
536 parasite. B) *Mowgli* accepts that a parasite node  $u$  cospeciates with a host at a node  $x$ , if the two nodes  
537 share an area. C) To map a parasite node  $u$  inside a branch  $(x_p, x)$  – to represent the origin of a host  
538 switch, or a duplication of the parasite, *Mowgli* requires that  $u$  lived in an area of  $x_p$  or  $x$  (if  $u$  lived in  
539 several areas, the constraint holds for each of these areas); D) To map a branch  $(u_p, u)$  of the parasite  
540 tree inside a branch  $(x_p, x)$  of the host tree, *Mowgli* requires that  $u_p$  or  $u$  lives in an area also assigned to  
541 node  $x_p$  or to node  $x$ . This is required whether  $u_p$  is located at  $x_p$ , between  $x$  and  $x_p$ , or is in another  
542 branch due to a host switch and similarly for  $u$ ; E) A parasite on a branch  $(u_p, u)$  can go through a  
543 speciation  $x$  of their hosts whenever  $area(u_p, u)$  inhabits some area of  $x$ .

544 Figure 2: Results of the reconciliations obtained on a simulated data set with default cost settings: A)  
545 without enforcing geographic constraints (7 coSpeciation events, 1 Transfer, 1 Loss), B) when  
546 enforcing geographic constraints (6 S, 2 T, 1 L). The big pie charts correspond to the host ancestral  
547 geographic areas while small pie charts correspond to the symbiont ancestral geographic areas. The  
548 leaves of the species tree are also coloured according to their contemporary geographic distribution.  
549 Annotations files given for the host tree and the symbiont tree specified a single most likely area at  
550 each node.

551 Figure 3: Results of the reconciliations obtained on the fig/fig wasp data set with default cost settings:  
552 A) without enforcing geographic constraints (events: 17 S, 6 T, 1 L), b) when enforcing geographic  
553 constraints (events: 16 S, 7 T, 1 L). Big pie charts correspond to the *Ficus* ancestral geographic areas,  
554 small pie charts correspond to the pollinator ancestral geographic areas. The leaves of the phylogenetic  
555 trees are coloured according to contemporary geographic distribution of the associates. Annotation  
556 files given for the host tree and the symbiont tree indicate the likelihood of each geographic area at  
557 each node (i.e. each section of the pies correspond to the likelihood of different states; here it does not  
558 indicate a multistate character, i.e. the proportion of the population in each area). Annotation file for  
559 the specie tree also included *Ficus* taxonomic subdivisions and are reported in the right inside of the  
560 figure.

561 Supplementary Material 1: *Mowgli* manual

562 Supplementary Material 2: Description of the pipeline to generate trees and annotation files that can be  
563 taken as inputs for both *Mowgli* and *Sylvx*.

564

**A**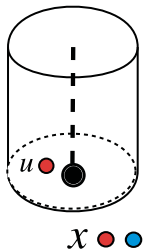**B**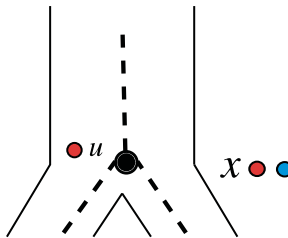**C**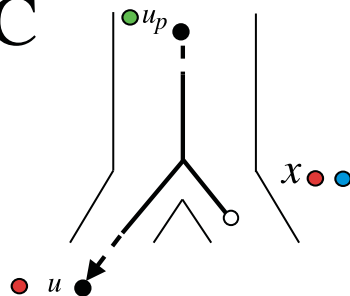**D**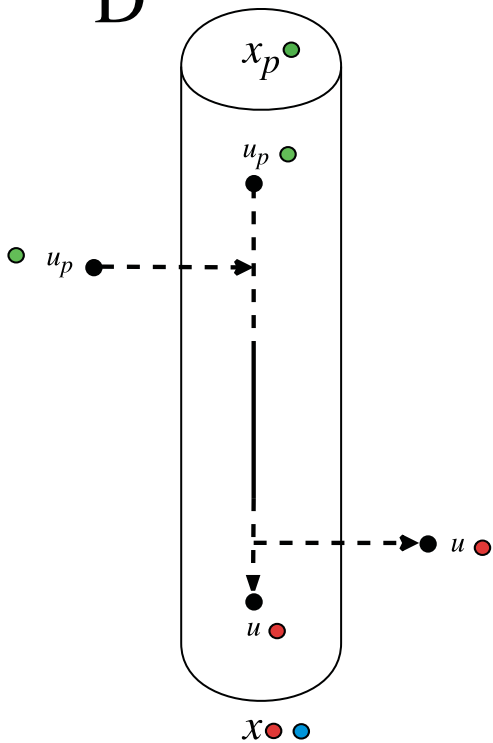**E**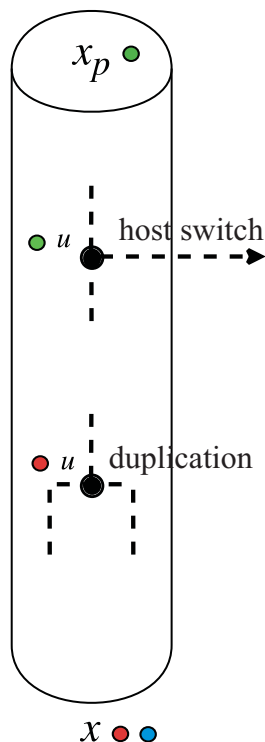

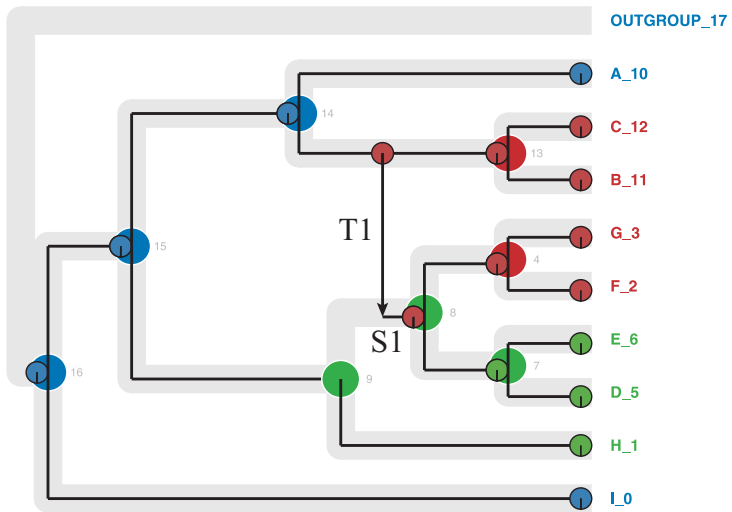

● Asia    ● Africa    ● America

Figure 2A

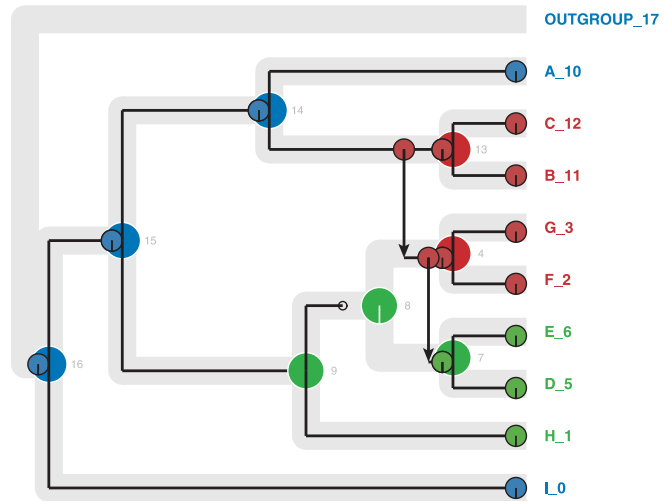

Figure 2B



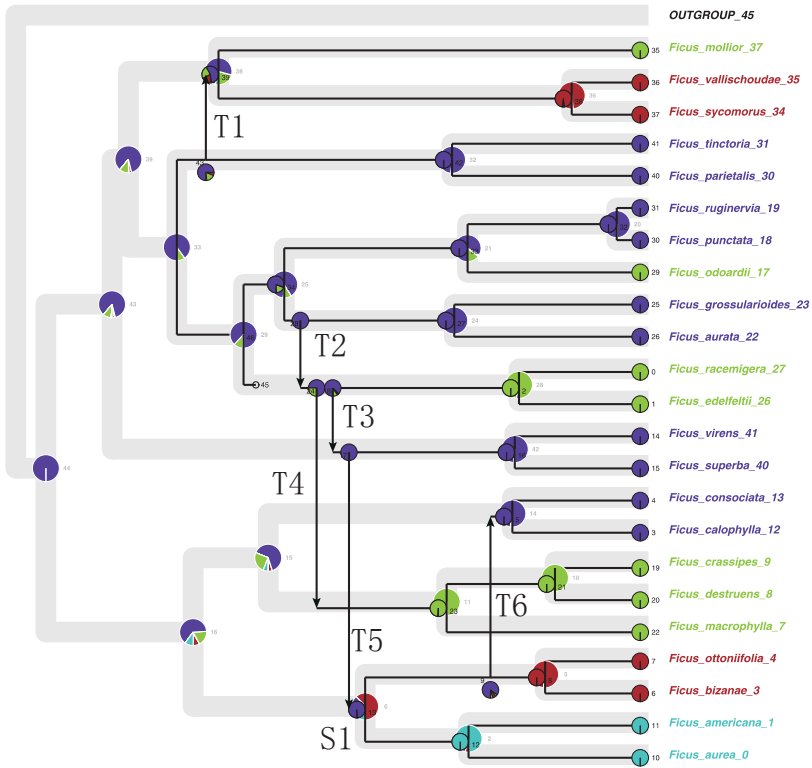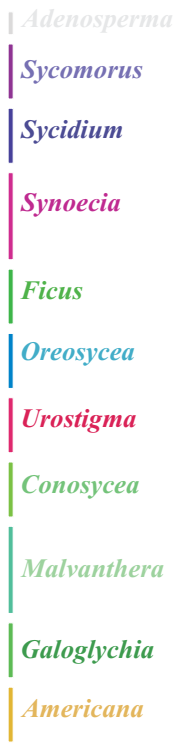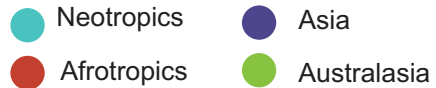

Figure 3A

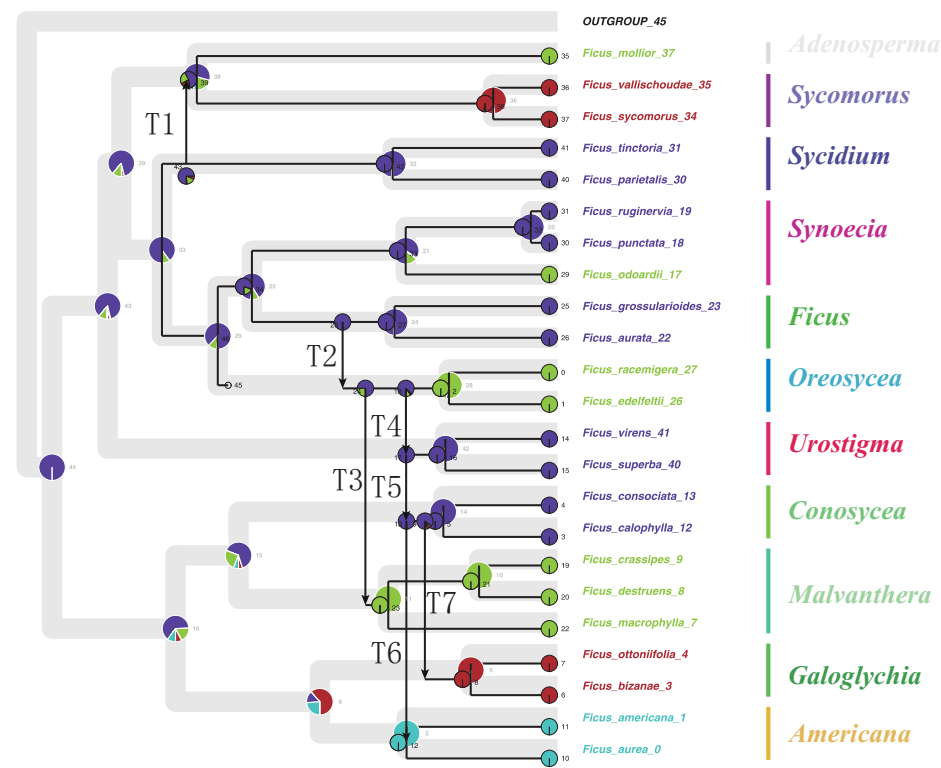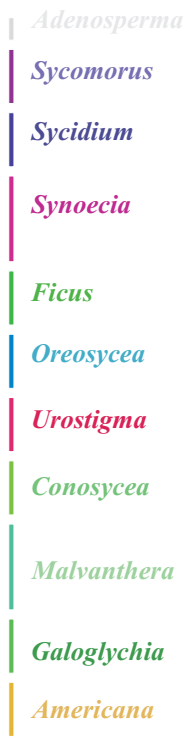

Figure 3B
